# Supplementary material for: Hypoxia-seeking behaviour, metabolic depression, and skeletal muscle function in an amphibious fish out of water
Source: Oxford University Press journal article supplement (doi:10.1242/jeb.213355), 2019-01-01
Supplement: jeb213355supp.pdf [file jeb213355supp.pdf]

## Supplementary Material

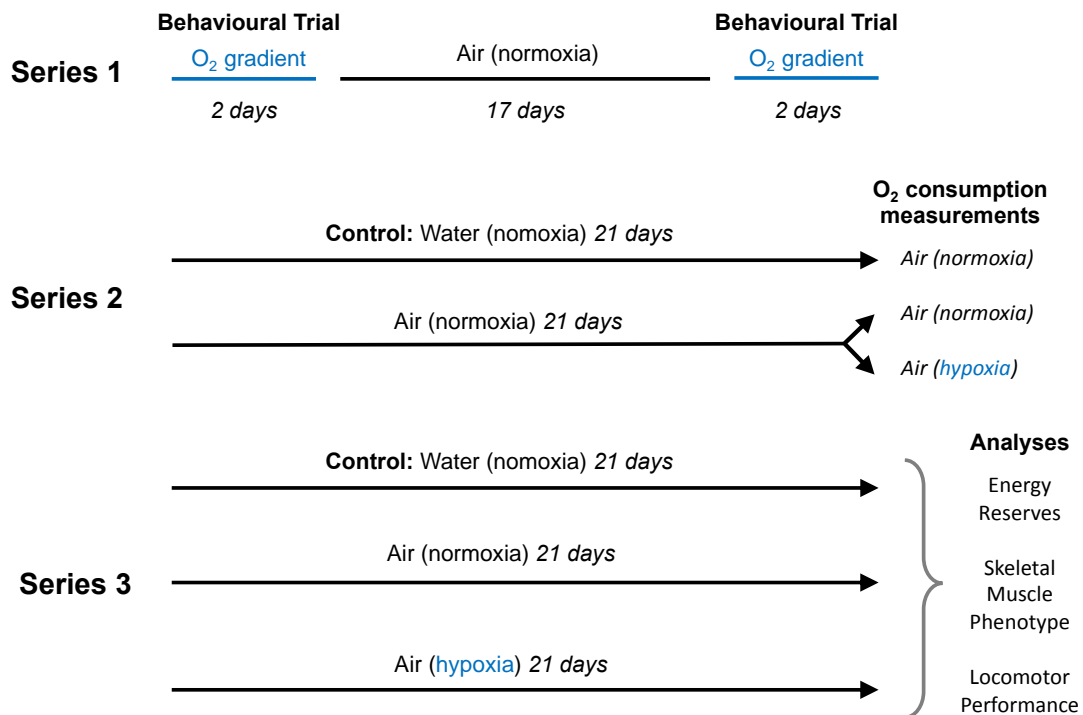

**Figure S1:** Schematic representation of the timeline for each series of experiment.

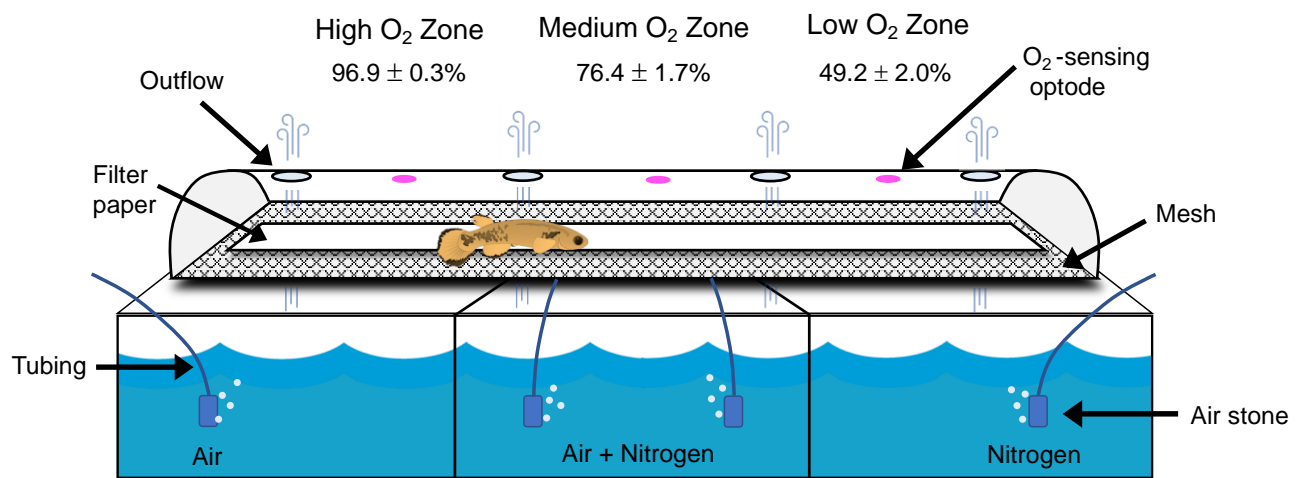

**Figure S2:** Schematic representation of a custom-built experimental choice chamber resting over 3 buckets of water. The pO<sub>2</sub> within the high O<sub>2</sub> zone (left), medium O<sub>2</sub> zone (centre), and low O<sub>2</sub> zone (right) was determined using O<sub>2</sub>-sensing optodes (Loligo Systems WITROX 4, Tjele, Denmark).

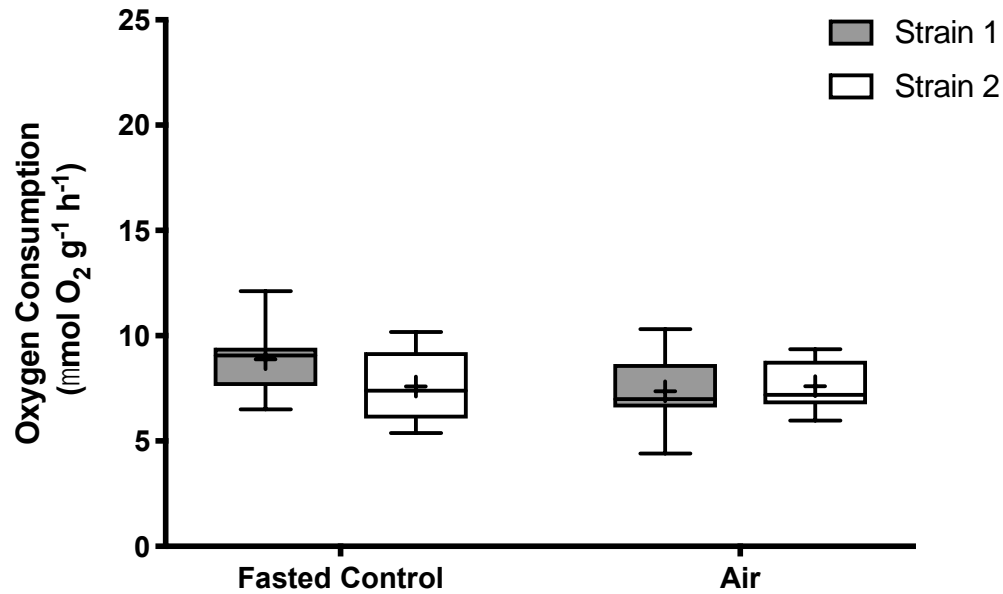

**Figure S3:** The mass-specific rate of O<sub>2</sub> consumption in water-acclimated *K. marmoratus* that were fasted for 21 days (Strain 1, n=9; Strain 2, n=8) and air-acclimated fish in aerial normoxia (Strain 1, n=8; Strain 2, n=8). There is no significant difference between means. Means are shown as crosses within the box.
